# Supplementary material for: WaveletQuant, an improved quantification software based on wavelet signal threshold de-noising for labeled quantitative proteomic analysis
Source: Springer Nature journal article supplement (doi:10.1186/1471-2105-11-219), 2010-04-29

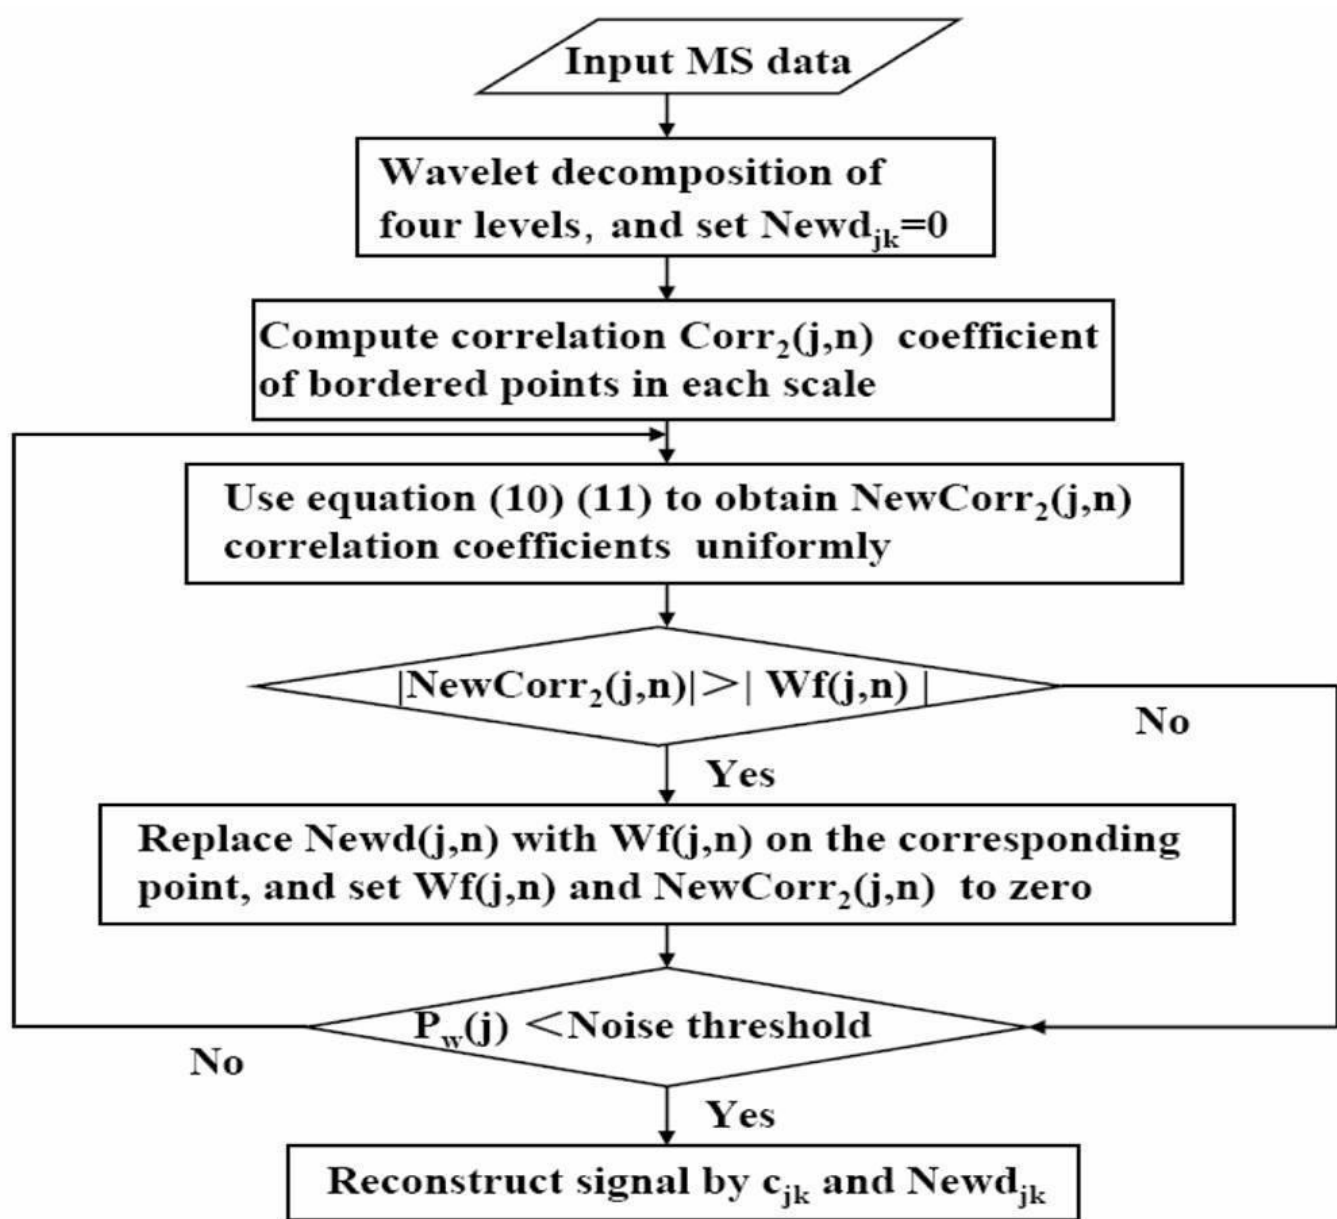

Supplement: 12859_2009_3676_MOESM5_ESM.pdf [file 12859_2009_3676_MOESM5_ESM.pdf]
